# Supplementary material for: The IL-33/ST2 pathway shapes the regulatory T cell phenotype to promote intestinal cancer
Source: PubMed Central journal article supplement (PMC7746527; doi:10.1038/s41385-019-0176-y), 2019-06-05
Supplement: 41385_2019_176_MOESM1_ESM.pdf [file 41385_2019_176_MOESM1_ESM.pdf]

## **Supplementary Information**

**Supplementary Figure 1**

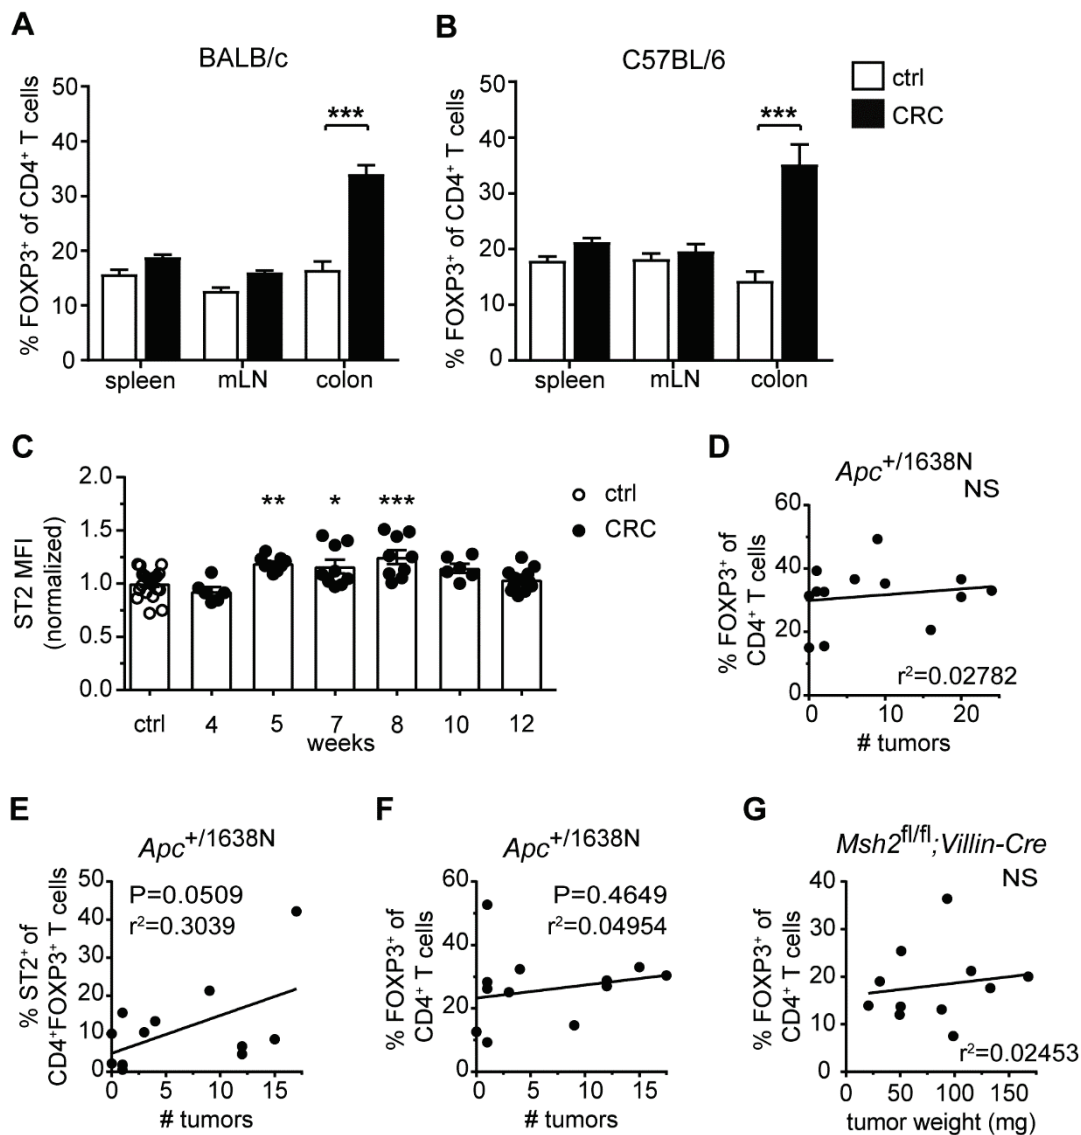

***FOXP3<sup>+</sup> Tregs preferentially accumulate in AOM/DSS-induced CRC lesions but do not correlate with tumorigenesis in murine genetic models of CRC.***

(A) BALB/c (n=7-8 mice per group) or (B) C57BL/6 (n=15-22 animals per group) mice were treated with AOM/DSS (CRC) or left untreated (ctrl), and frequencies of CD4<sup>+</sup> FOXP3<sup>+</sup> Tregs cells were analyzed in spleen, mesenteric lymph nodes (mLN) or colon. (C) ST2 mean fluorescence intensity (MFI) relative to isotype control was measured on ST2<sup>+</sup> FOXP3<sup>+</sup> Tregs isolated from CRC lesions of BALB/c mice at the indicated time points during AOM/DSS treatment (n=20 for ctrl and n=6-12 for CRC mice per time point). Alternatively, *Apc*<sup>+1638N</sup>

mice (n=13) were analyzed at different ages and frequencies of ST2<sup>+</sup> FOXP3<sup>+</sup> or FOXP3<sup>+</sup> Treg were correlated with tumor numbers in the **(D)** colon or **(E, F)** small intestine. **(G)** *Msh2<sup>fl/fl</sup>; Villin-Cre* mice (n=11) were analyzed 269-342 days after birth and frequencies of FOXP3<sup>+</sup> Treg were correlated with tumor weight in the small intestine. Data are mean ± SEM and were pooled from **(A, G)** two, **(B)** four, **(C)** three or **(D-F)** several independent experiments. Statistical analyses were performed using **(A, B)** two-way ANOVA with Sidak post-test or **(C)** one-way ANOVA with Dunnett's post-test, and correlations were calculated using **(D, G)** Spearman or **(E, F)** Pearson correlation analysis. NS, non-significant. \*:  $P < 0.05$ ; \*\*:  $P < 0.01$ ; \*\*\*:  $P < 0.001$ .

## Supplementary Figure 2

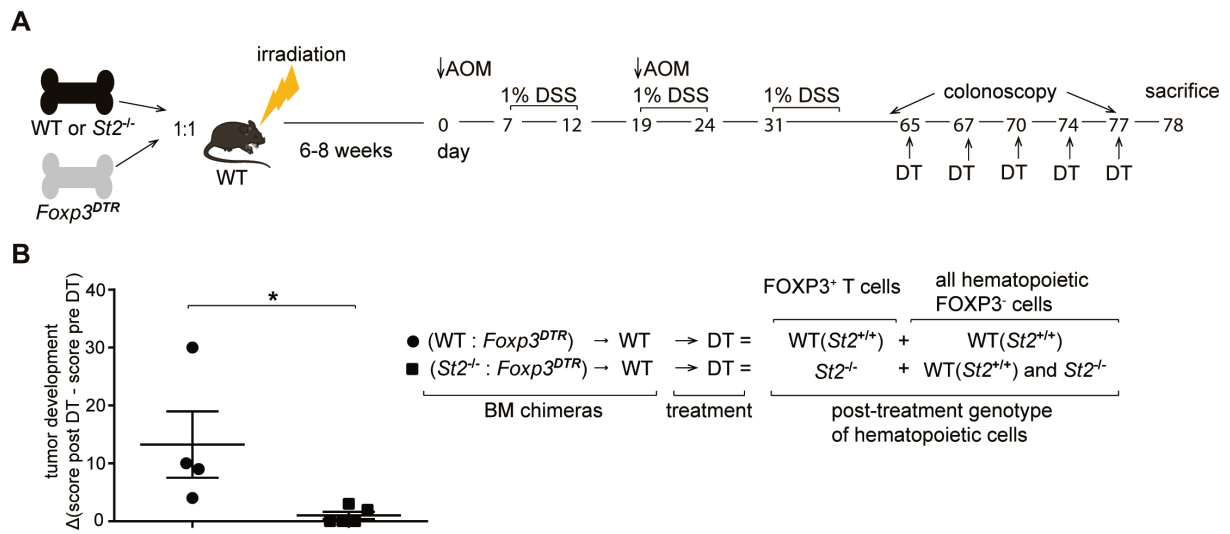

### *FOXP3<sup>+</sup> Tregs-restricted St2 deficiency leads to improved CRC control.*

Indicated sets of mixed chimeric mice were treated with AOM/DSS and injected i.p. with diphtheria toxin (DT) to deplete DT receptor-expressing FOXP3<sup>+</sup> Tregs. **(A)** Experimental setup. **(B)** Colonoscopy was performed to assess tumor score at different time points, and tumor development was calculated by subtracting tumor score before from tumor score post DT application. Data are mean  $\pm$  SEM (n=4-5 mice per group). Statistical analysis was performed using Mann-Whitney test. \*:  $P < 0.05$ .

**Supplementary Figure 3**

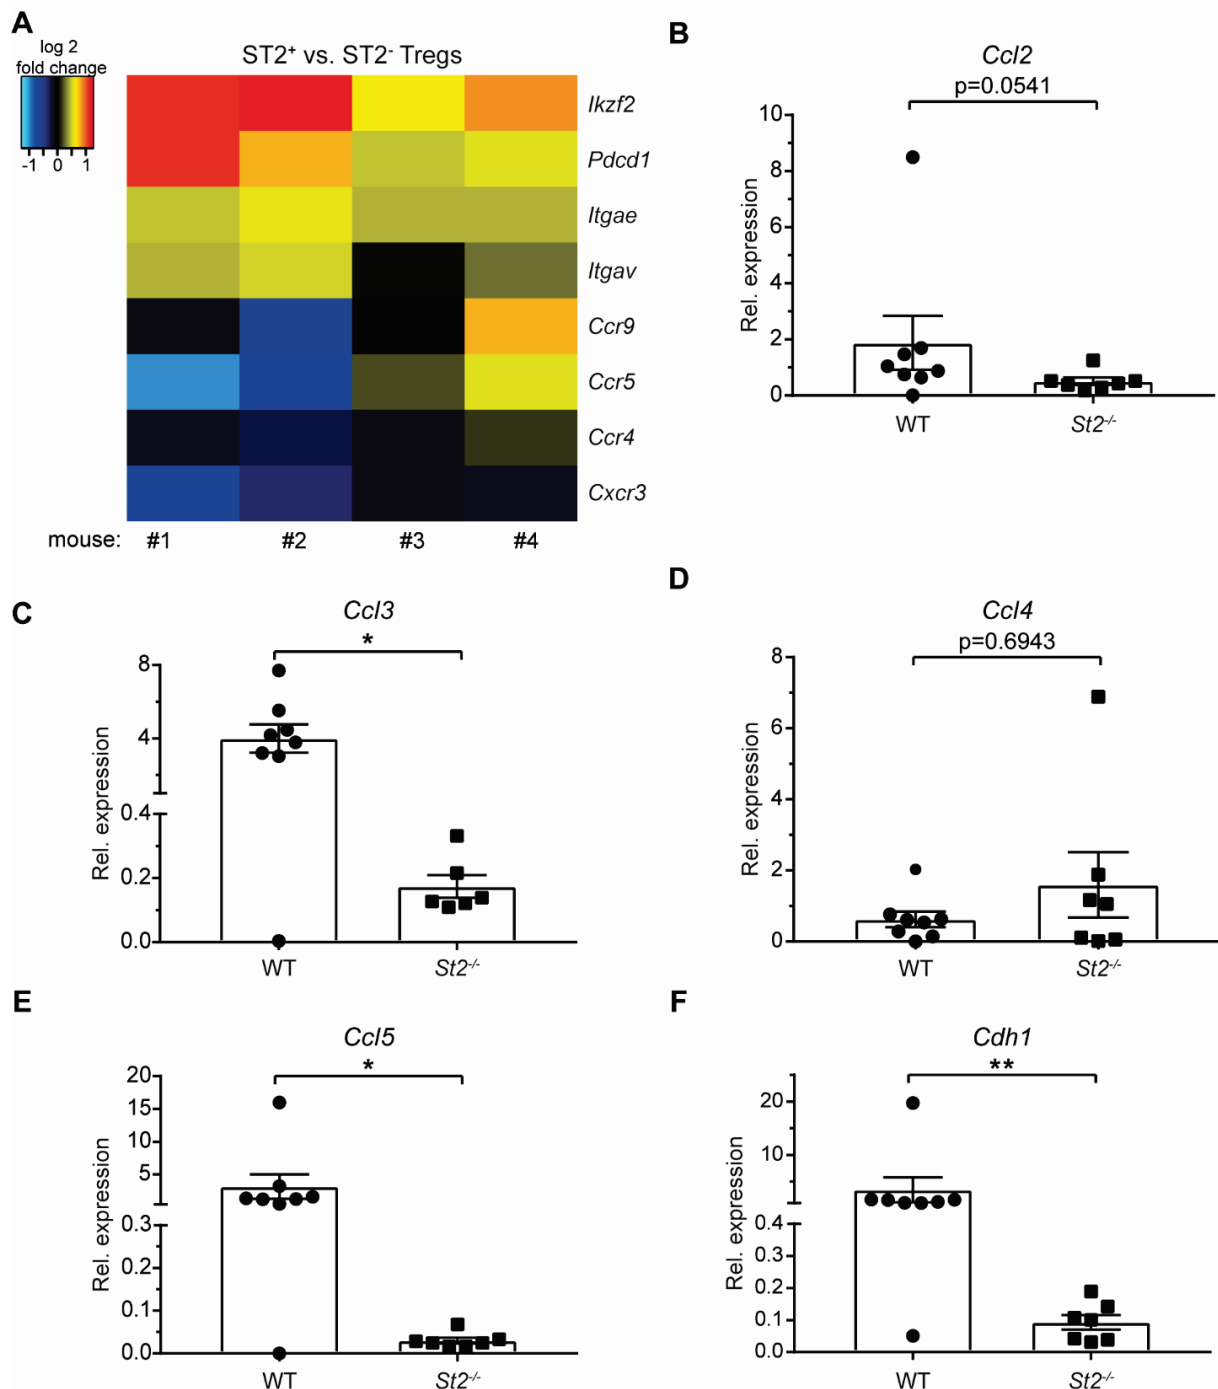

***ST2* modulates the expression of migration-associated molecules in tumor-derived FOXP3<sup>+</sup> Tregs and in CRC lesions.**

(A) Heat map showing expression levels of selected genes in the gene ontology pathway “leukocyte migration” (GO:0050900) in ST2<sup>+</sup> versus ST2<sup>-</sup> eGFP<sup>+</sup> Tregs isolated from the intestine of the indicated four mice, after AOM/DSS treatment. Blue indicates higher transcript

expression in ST2<sup>-</sup> Tregs and red higher expression in ST2<sup>+</sup> Tregs. *Ikzf2*, *Pdcd1*, and *Itgae* are differentially expressed in tumor-derived ST2<sup>+</sup> versus ST2<sup>-</sup> Tregs (adjusted p value  $p \leq 0.05$ ). Alternatively, WT versus *St2*<sup>-/-</sup> mice were treated with AOM/DSS and transcript levels were quantified in CRC lesions of WT versus *St2*<sup>-/-</sup> mice for **(B)** *Ccl2*, **(C)** *Ccl3*, **(D)** *Ccl4*, **(E)** *Ccl5* and **(F)** *Cdh1*. For panels **(B-F)**, data represent means  $\pm$  SEM and statistical analyses were performed using Mann-Whitney test (n=6-8 mice per group). \*:  $P < 0.05$ , \*\*:  $P < 0.01$ .

### **Supplementary Table 1**

Table listing the 58 gene ontology pathways that are differentially expressed in ST2<sup>+</sup> versus ST2<sup>-</sup> eGFP<sup>+</sup> Tregs isolated from CRC lesions (with adjusted p value p<0.001 and corrected p value p<0.001). Related to the data depicted in Figure 4.

| <b>name</b>   | <b>description</b>                                                       | <b>trivial name</b> | <b>database</b> | <b>size</b> | <b>pSetRank</b> | <b>correctedPValue</b> | <b>adjustedPValue</b> |
|---------------|--------------------------------------------------------------------------|---------------------|-----------------|-------------|-----------------|------------------------|-----------------------|
| GO:0032496    | response to lipopolysaccharide                                           | LPS resp.           | GOBP            | 177         | 1,93E-025       | 3,50E-010              | 1,26E-008             |
| GO:1903706    | regulation of hemopoiesis                                                | Hemo. reg.          | GOBP            | 249         | 4,38E-015       | 1,04E-004              | 1,26E-008             |
| ko04659       | Th17 cell differentiation                                                | Th17 dif.           | KEGG            | 88          | 2,77E-012       | 2,26E-005              | 1,26E-008             |
| GO:0050900    | leukocyte migration                                                      | Leuk. migration     | GOBP            | 145         | 1,92E-011       | 9,34E-007              | 1,26E-008             |
| GO:0006412    | translation                                                              | transl.             | GOBP            | 187         | 1,19E-008       | 5,76E-009              | 1,26E-008             |
| GO:0030098    | lymphocyte differentiation                                               | Lymph. dif.         | GOBP            | 207         | 1,30E-008       | 2,29E-006              | 1,26E-008             |
| R-MMU-198933  | Immunoregulatory interactions between a Lymphoid and a non-Lymphoid cell | Lymph. Inter.       | REACTOME        | 77          | 4,05E-007       | 2,43E-009              | 1,26E-008             |
| ko00190       | Oxidative phosphorylation                                                | OXPHOS              | KEGG            | 92          | 7,37E-005       | 1,04E-007              | 1,26E-008             |
| WP373         | IL-3 Signaling Pathway                                                   | IL-3 sign.          | WikiPathways    | 80          | 1,88E-004       | 3,71E-005              | 1,26E-008             |
| GO:0050727    | regulation of inflammatory response                                      | Inflam. resp. reg.  | GOBP            | 216         | 5,30E-004       | 2,56E-004              | 1,26E-008             |
| GO:0022409    | positive regulation of cell-cell adhesion                                | Cell-cell adh.      | GOBP            | 175         | 3,89E-003       | 9,29E-004              | 1,26E-008             |
| R-MMU-6791226 | Major pathway of rRNA processing in the nucleolus and cytosol            | rRNA proces.        | REACTOME        | 56          | 1,20E-002       | 1,26E-007              | 1,26E-008             |
| R-MMU-1433557 | Signaling by SCF-KIT                                                     | SCF-KIT sign.       | REACTOME        | 230         | 6,69E-002       | 1,99E-004              | 1,26E-008             |
| M00147        | NADH dehydrogenase (ubiquinone) 1 beta subcomplex                        | NADH deh. 1 $\beta$ | KEGG            | 12          | 1,00E+000       | 5,24E-009              | 1,26E-008             |
| GO:0051082    | unfolded protein binding                                                 | Unfold. prot. bind. | GOMF            | 62          | 1,00E+000       | 1,98E-007              | 1,26E-008             |
| R-MMU-69206   | G1/S Transition                                                          | G1/S Transition     | REACTOME        | 81          | 1,00E+000       | 9,19E-007              | 1,26E-008             |
| M00355        | Spliceosome, 35S U5-snRNP                                                | Splice. U5-snRNP    | KEGG            | 24          | 1,00E+000       | 2,53E-006              | 1,26E-008             |

|               |                                                                   |                         |              |     |           |           |           |
|---------------|-------------------------------------------------------------------|-------------------------|--------------|-----|-----------|-----------|-----------|
| R-MMU-975576  | N-glycan antennae elongation in the medial/trans-Golgi            | N-gly. elong.           | REACTOME     | 19  | 1,00E+000 | 7,64E-006 | 1,26E-008 |
| GO:0072678    | T cell migration                                                  | Tc migration            | GOBP         | 13  | 1,00E+000 | 4,40E-005 | 1,26E-008 |
| GO:0045862    | positive regulation of proteolysis                                | Proteolysis reg.        | GOBP         | 214 | 1,00E+000 | 5,02E-005 | 1,26E-008 |
| GO:0031072    | heat shock protein binding                                        | HSP bind.               | GOMF         | 86  | 1,00E+000 | 7,20E-005 | 1,26E-008 |
| GO:0002761    | regulation of myeloid leukocyte differentiation                   | Myeloid leuk. dif.      | GOBP         | 94  | 1,00E+000 | 9,22E-005 | 1,26E-008 |
| GO:1903205    | regulation of hydrogen peroxide-induced cell death                | H2O2 cel. death         | GOBP         | 27  | 1,00E+000 | 9,99E-005 | 1,26E-008 |
| WP387         | IL-6 signaling Pathway                                            | IL-6 sign.              | WikiPathways | 78  | 1,00E+000 | 1,01E-004 | 1,26E-008 |
| GO:0036438    | maintenance of lens transparency                                  | Lens transp.            | GOBP         | 3   | 1,00E+000 | 1,07E-004 | 1,26E-008 |
| R-MMU-5668541 | TNFR2 non-canonical NF-kB pathway                                 | TNFR2 path.             | REACTOME     | 76  | 1,00E+000 | 1,47E-004 | 1,26E-008 |
| R-MMU-114508  | Effects of PIP2 hydrolysis                                        | PIP2 hydrol.            | REACTOME     | 21  | 1,00E+000 | 1,69E-004 | 1,26E-008 |
| GO:0043122    | regulation of I-kappaB kinase/NF-kappaB signaling                 | NFκB sign.              | GOBP         | 166 | 1,00E+000 | 1,90E-004 | 1,26E-008 |
| GO:0042254    | ribosome biogenesis                                               | Ribosome bio.           | GOBP         | 159 | 1,00E+000 | 2,11E-004 | 1,26E-008 |
| GO:0043161    | proteasome-mediated ubiquitin-dependent protein catabolic process | Ub. catab.              | GOBP         | 165 | 1,00E+000 | 3,02E-004 | 1,26E-008 |
| GO:0042273    | ribosomal large subunit biogenesis                                | Large ribosome bio.     | GOBP         | 34  | 1,00E+000 | 3,20E-004 | 1,26E-008 |
| GO:0032956    | regulation of actin cytoskeleton organization                     | Cytosk. org.            | GOBP         | 212 | 1,00E+000 | 3,47E-004 | 1,26E-008 |
| ko04060       | Cytokine-cytokine receptor interaction                            | Cytokine/rec.           | KEGG         | 200 | 1,00E+000 | 3,57E-004 | 1,26E-008 |
| ko04071       | Sphingolipid signaling pathway                                    | Sph.lipid sign.         | KEGG         | 101 | 1,00E+000 | 3,97E-004 | 1,26E-008 |
| GO:0017124    | SH3 domain binding                                                | SH3 bind.               | GOMF         | 90  | 1,00E+000 | 4,42E-004 | 1,26E-008 |
| GO:0030139    | endocytic vesicle                                                 | Endo. ves.              | GOCC         | 100 | 1,00E+000 | 4,90E-004 | 1,26E-008 |
| ko03040       | Spliceosome                                                       | Splice.                 | KEGG         | 87  | 1,00E+000 | 5,04E-004 | 1,26E-008 |
| GO:0043021    | ribonucleoprotein complex binding                                 | RNP bind.               | GOMF         | 91  | 1,00E+000 | 5,07E-004 | 1,26E-008 |
| GO:0030667    | secretory granule membrane                                        | Sec. granule            | GOCC         | 59  | 1,00E+000 | 5,31E-004 | 1,26E-008 |
| GO:0090197    | positive regulation of chemokine secretion                        | Chemokine sec.          | GOBP         | 10  | 1,00E+000 | 5,32E-004 | 1,26E-008 |
| GO:0002762    | negative regulation of myeloid leukocyte differentiation          | Neg. myeloid leuk. dif. | GOBP         | 37  | 1,00E+000 | 5,36E-004 | 1,26E-008 |
| R-MMU-72689   | Formation of a pool of free 40S subunits                          | 40S sub.                | REACTOME     | 22  | 1,00E+000 | 5,42E-004 | 1,26E-008 |
| M00146        | NADH dehydrogenase (ubiquinone) 1 alpha subcomplex                | NADH deh. 1α            | KEGG         | 14  | 1,00E+000 | 5,55E-004 | 1,26E-008 |



|               |                                                                             |                     |              |     |           |           |           |
|---------------|-----------------------------------------------------------------------------|---------------------|--------------|-----|-----------|-----------|-----------|
| R-MMU-72695   | Formation of the ternary complex, and subsequently, the 43S complex         | 43S complex         | REACTOME     | 14  | 1,00E+000 | 5,73E-004 | 1,26E-008 |
| M00337        | Immunoproteasome                                                            | Immunoprot.         | KEGG         | 14  | 1,00E+000 | 6,06E-004 | 1,26E-008 |
| M00340        | Proteasome, 20S core particle                                               | 20S proteasome      | KEGG         | 10  | 1,00E+000 | 6,06E-004 | 1,26E-008 |
| WP1496        | Oxidative Damage                                                            | Ox. dam.            | WikiPathways | 29  | 1,00E+000 | 6,46E-004 | 1,26E-008 |
| R-MMU-1169091 | Activation of NF-kappaB in B cells                                          | NF $\kappa$ B in Bc | REACTOME     | 49  | 1,00E+000 | 6,87E-004 | 1,26E-008 |
| mmu04068      | FoxO signaling pathway                                                      | FoxO sign.          | KEGG         | 102 | 1,00E+000 | 6,93E-004 | 1,26E-008 |
| GO:0002113    | interleukin-33 binding                                                      | IL-33 binding       | GOMF         | 1   | 1,00E+000 | 7,02E-004 | 1,26E-008 |
| GO:0001503    | ossification                                                                | ossif.              | GOBP         | 171 | 1,00E+000 | 7,52E-004 | 1,26E-008 |
| GO:0006606    | protein import into nucleus                                                 | Nucl. Import        | GOBP         | 86  | 1,00E+000 | 7,90E-004 | 1,26E-008 |
| ko04210       | Apoptosis                                                                   | Apopt.              | KEGG         | 107 | 1,00E+000 | 8,07E-004 | 1,26E-008 |
| R-MMU-446203  | Asparagine N-linked glycosylation                                           | Asp. N-gly.         | REACTOME     | 175 | 1,00E+000 | 8,77E-004 | 1,26E-008 |
| GO:0051250    | negative regulation of lymphocyte activation                                | Neg. reg. lymph.    | GOBP         | 104 | 1,00E+000 | 9,00E-004 | 1,26E-008 |
| GO:0030108    | HLA-A specific activating MHC class I receptor activity                     | MHC I rec. activity | GOMF         | 1   | 1,00E+000 | 9,57E-004 | 1,26E-008 |
| GO:0032154    | cleavage furrow                                                             | cleav. furrow       | GOCC         | 25  | 1,00E+000 | 9,70E-004 | 1,26E-008 |
| GO:0007157    | heterophilic cell-cell adhesion via plasma membrane cell adhesion molecules | Cell-cell adh.      | GOBP         | 41  | 1,00E+000 | 9,98E-004 | 1,26E-008 |

**Supplementary Table 2 (Antibodies, clones, conjugates and manufacturers)**

***Murine***

| <b>Specificity</b>          | <b>Clone name</b> | <b>Conjugated to</b> | <b>Catalog number</b> | <b>Source</b>  |
|-----------------------------|-------------------|----------------------|-----------------------|----------------|
| CD4                         | RM4-4             | Pacific Blue         | 116008                | Biolegend      |
| CD4                         | RM4-5             | Pacific Blue         | 558107                | BD Biosciences |
| CD4                         | RM4-5             | BrilliantViolet 650  | 563747                | BD Biosciences |
| CD4                         | GK15              | APC                  | 100412                | BioLegend      |
| CD8 $\alpha$                | 53-6.7            | AlexaFluor700        | 45-5981-80            | BioLegend      |
| CD8 $\alpha$                | 53-6.7            | BrilliantViolet 510  | 100752                | BioLegend      |
| CD8 $\alpha$                | 53-6.7            | FITC                 | 100706                | BioLegend      |
| CD11c                       | HL3               | V450                 | 560521                | BD Biosciences |
| CD335                       | 29.A1.4           | Per-CP/Cy5.5         | 137610                | BioLegend      |
| CD335                       | 29.A1.4           | V450                 | 560763                | BD Biosciences |
| B220                        | RA3-6B2           | PE                   | 561878                | BD Biosciences |
| F4/80                       | BM8               | PE                   | 12-4801-82            | ThermoFisher   |
| FOXP3                       | FJK-16s           | FITC                 | 11-5773-82            | ThermoFisher   |
| CD62L                       | MEL-14            | APC-Cy7              | 104428                | BioLegend      |
| CD25                        | PC61              | Per-CP/Cy5.5         | 102030                | BioLegend      |
| ST2                         | DIH9              | APC                  | 145305                | BioLegend      |
| ST2                         | DIH9              | PerCP-Cy5.5          | 145311                | BioLegend      |
| ST2                         | RMST2-2           | APC                  | 17-9335-82            | ThermoFisher   |
| ST2                         | RMST2-2           | PE-Cy7               | 25-9335-82            | ThermoFisher   |
| Fixable viability dye (FVD) |                   | eFluor506            | 65-0866-14            | ThermoFisher   |
| Fixable viability dye (FVD) |                   | eFluor780            | 65-0865-14            | ThermoFisher   |
| GZMB                        | GB11              | Pacific Blue         | 515408                | BioLegend      |
| CD103                       | 2E7               | PerCP-Cy5.5          | 121415                | BioLegend      |
| CD103                       | M290              | PE                   | 557495                | BD Biosciences |
| PD-1                        | J43               | PE-Cy7               | 25-9985               | ThermoFisher   |

|              |            |               |            |                |
|--------------|------------|---------------|------------|----------------|
| PD-1         | RMP1-30    | PE-Cy7        | 109110     | BioLegend      |
| IFN $\gamma$ | XMG1.2     | APC           | 505810     | BioLegend      |
| IL-17A       | TC11-18H10 | PE            | 559502     | BD Biosciences |
| CD51         | RMV-7      | PE            | 104105     | BioLegend      |
| Helios       | 22F6       | eFluor450     | 48-9883-42 | ThermoFisher   |
| CXCR3        | CXCR3-173  | PE            | 12-1831-82 | ThermoFisher   |
| CCR4         | 2G12       | PE-Cy7        | 131213     | BioLegend      |
| CCR5         | HM-CCR5    | PE            | 12-1951-81 | ThermoFisher   |
| CCR9         | 9B1        | AlexaFluor647 | 129709     | BioLegend      |
| Ki67         | SolA15     | PE-Cy7        | 25-5698-80 | ThermoFisher   |

### *Human*

| <b>Specificity</b> | <b>Clone name</b> | <b>Conjugated to</b> | <b>Catalog number</b> | <b>Source</b>  |
|--------------------|-------------------|----------------------|-----------------------|----------------|
| ST2                | B4E6              | FITC                 | 101002F               | MD Bioproducts |
| CD4                | RPA-T4            | PE                   | 12-0049-41            | ThermoFisher   |
| CD4                | RPA-T4            | Pacific Blue         | 558116                | BD Biosciences |
| FOXP3              | PCH101            | APC                  | 17-4776-41            | ThermoFisher   |
| FOXP3              | PCH101            | PE                   | 12-4776-42            | ThermoFisher   |
| CXCR3              | CEW33D            | PE-Cy7               | 25-1839-42            | ThermoFisher   |
| CXCR3              | CEW33D            | PE                   | 12-1839-42            | ThermoFisher   |
| CD103              | Ber-ACT8          | BrilliantViolet 605  | 350217                | BioLegend      |
| CCR5               | HEK/1/85a         | Alexa Fluor® 647     | 313712                | BioLegend      |

**Supplementary Table 3 (microarray – gene expression)**

Data output from the limma analysis for gene expression data in ST2+ versus ST2- Tregs from intestinal tumors (see attached .xls file).

**Supplementary Table 4 (microarray – pathway analysis)**

List of all pathways detected by the SetRank method upon analysis of the microarray data from ST2+ versus ST2- Tregs from intestinal tumors (see attached .xls file).
